# Supplementary material for: A novel twelve-gene signature to evaluate neoadjuvant chemotherapy response and predict prognosis in breast cancer
Source: Research Square preprint supplement (doi:10.21203/rs.3.rs-1308081/v2), 2022-08-02
Supplement: Supplementary file 1 [file f341ade5110e74a3849e2105.docx]

| **Table 3. the GO and KEGG of twelve-genes** | | |
| --- | --- | --- |
| **Gene name** | **GO** | **KEGG** |
| **HJURP** | **GO:0005515;GO:0005694;GO:0003677;GO:0005739;GO:0005829;GO:0005730;GO:0005634;GO:0007049;GO:0042393;GO:0042802;GO:0007059;GO:0000775;GO:0000777;GO:0005654;GO:0034080;GO:0051101;GO:0043254** | **-** |
| **IFI27** | **GO:0016021;GO:0016020;GO:0060135;GO:0034097;GO:0032355** | **-** |
| **RAD51AP1** | **GO:0006281;GO:0003723;GO:0005634;GO:0003690;GO:0003697;GO:0005515;GO:0003677;GO:0006974;GO:0006310;GO:0005654;GO:0010569;GO:0000790;GO:0000724;GO:0000731;GO:0000732;GO:0071479;GO:0036297** | **-** |
| **EZH2** | **GO:0018024;GO:0034968;GO:0048511;GO:0005515;GO:0000790;GO:0016569;GO:0031490;GO:0006355;GO:0006351;GO:0032259;GO:0016740;GO:0008168;GO:0005634;GO:0043547;GO:0001047;GO:0000122;GO:0048387;GO:0005654;GO:0003682;GO:0035098;GO:0003677;GO:0045892;GO:0010718;GO:0042752;GO:0045814;GO:0042054;GO:0006325;GO:1990841;GO:0043406;GO:0071902;GO:0016571;GO:0016279;GO:0046976;GO:0070734;GO:0045120;GO:0005737;GO:2000134;GO:1904772;GO:0098532;GO:1900006;GO:0097421;GO:0071168;GO:0070314;GO:0070301;GO:0051154;GO:0050767;GO:0045605;GO:0043433;GO:0042127;GO:0036333;GO:0035984;GO:0034244;GO:0032355;GO:0021766;GO:0021695;GO:0014898;GO:0014834;GO:0014013;GO:0010629;GO:0010468;GO:0006357;GO:0006306;GO:0001932;GO:0070878;GO:0043565;GO:0043021;GO:0003723;GO:0000979;GO:0000975** | **K11430-ko05206 MicroRNAs in cancer** |
| **DNMT3B** | **GO:0005737;GO:0005634;GO:0071549;GO:0071455;GO:0045892;GO:0045666;GO:0042493;GO:0042220;GO:0033189;GO:0032355;GO:0031000;GO:0014823;GO:0010212;GO:0009636;GO:0001666;GO:0042826;GO:0003682;GO:0003677;GO:0005515;GO:0032259;GO:0016740;GO:0008168;GO:0005654;GO:0046872;GO:0043231;GO:0010468;GO:0006306;GO:0009008;GO:0003714;GO:0000122;GO:0010628;GO:0045814;GO:0051571;GO:0003886;GO:0051573;GO:0090116** | **K17399-ko00270 Cysteine and methionine metabolism;ko05206 MicroRNAs in cancer** |
| **SLC7A5** | **GO:0005886;GO:0005829;GO:0016020;GO:0043231;GO:0016021;GO:0015171;GO:0003333;GO:0015807;GO:0015179;GO:1902475;GO:0005737;GO:0006810;GO:0007275;GO:0007399;GO:0030154;GO:0006865;GO:0050900;GO:0005887;GO:0070062;GO:0015297;GO:0016324;GO:0042605;GO:0006520;GO:0015804;GO:0015175** | **K13780-ko04150 mTOR signaling pathway;ko05230 Central carbon metabolism in cancer** |
| **DBF4** | **GO:0005515;GO:0043085;GO:0005634;GO:0046872;GO:0008270;GO:0003676;GO:0007049;GO:0006260;GO:0005654;GO:0000082;GO:0008047** | **K06629-ko04110 Cell cycle** |
| **USP18** | **GO:0006508;GO:0008234;GO:0008233;GO:0005515;GO:0016787;GO:0016579;GO:0005829;GO:0005737;GO:0005634;GO:0036459;GO:0006511;GO:0004843;GO:0060338;GO:0019785** | **-** |
| **ELOVL5** | **GO:0005783;GO:0042761;GO:0034626;GO:0019367;GO:0006633;GO:0006631;GO:0102338;GO:0102337;GO:0102336;GO:0009922;GO:0006629;GO:0005789;GO:0016740;GO:0016021;GO:0016020;GO:0006636;GO:0034625;GO:0035338;GO:0030425;GO:0042995;GO:0005515;GO:0036109;GO:0043025;GO:0043651;GO:0097447** | **K10244-ko01212 Fatty acid metabolism;ko00062 Fatty acid elongation;ko01040 Biosynthesis of unsaturated fatty acids** |
| **PTGER3** | **GO:0007165;GO:0004871;GO:0005886;GO:0007186;GO:0004930;GO:0016021;GO:0016020;GO:0004955;GO:0004957;GO:0005887;GO:0005635;GO:0007200;GO:0031622;GO:0008219;GO:0014827;GO:0060455;GO:0008150** | **K04260-ko04020 Calcium signaling pathway;ko04024 cAMP signaling pathway;ko04080 Neuroactive ligand-receptor interaction;ko04923 Regulation of lipolysis in adipocyte;ko05200 Pathways in cancer** |
| **KIAA1324** | **GO:0005886;GO:0005765;GO:0005794;GO:0016021;GO:0016020;GO:0003723;GO:0006914;GO:0005764;GO:0005768;GO:0031902;GO:0070062;GO:0005770;GO:0005887;GO:0005802;GO:0009267;GO:0000045;GO:0044090;GO:2000786** | **-** |
| **CYBRD1** | **GO:0005515;GO:0055114;GO:0016491;GO:0046872;GO:0016021;GO:0016020;GO:0005886;GO:0070062;GO:0000293;GO:0010039;GO:0031526;GO:0005765;GO:0006879;GO:0016722** | **K08370-ko04978 Mineral absorption** |
